# Supplementary material for: Assessment of Price Variation in Coronary Artery Bypass Surgery at US Hospitals
Source: PubMed Central journal article supplement — J Am Heart Assoc. 2024 Feb 16;13(4):e031982. doi: 10.1161/JAHA.123.031982 (PMC11010067; doi:10.1161/jaha.123.031982), 2024-02-16

# **Supplemental Material**

**Table S1. Data Linkages.**

| Database                                                                                                   | Linkage                                                                  | Variables (Comments)                                                                                                                                                                                                                                                                                                                                                                                                                                                                                                                                                                                                                                                                                                                                                                                                                                                                                                               |
|------------------------------------------------------------------------------------------------------------|--------------------------------------------------------------------------|------------------------------------------------------------------------------------------------------------------------------------------------------------------------------------------------------------------------------------------------------------------------------------------------------------------------------------------------------------------------------------------------------------------------------------------------------------------------------------------------------------------------------------------------------------------------------------------------------------------------------------------------------------------------------------------------------------------------------------------------------------------------------------------------------------------------------------------------------------------------------------------------------------------------------------|
| Turquoise Health                                                                                           |                                                                          | <ul style="list-style-type: none"> <li>- Medicare Facility ID Number</li> <li>- Facility Name</li> <li>- Facility Zip Code</li> <li>- Facility State</li> <li>- Chargemaster Prices (hospital-reported)</li> <li>- Commercial Prices (hospital-reported)</li> <li>- Self-Pay Prices (hospital-reported)</li> </ul>                                                                                                                                                                                                                                                                                                                                                                                                                                                                                                                                                                                                                 |
| Medicare Provider of Service (POS) File, Q4 2021                                                           | Medicare Facility ID Number                                              | <ul style="list-style-type: none"> <li>- Hospital Ownership (Govt, Nonprofit, Profit)</li> <li>- Hospital Total Beds</li> </ul>                                                                                                                                                                                                                                                                                                                                                                                                                                                                                                                                                                                                                                                                                                                                                                                                    |
| Agency for Healthcare Research and Quality Compendium of U.S. Health Systems, 2018                         | Medicare Facility ID Number                                              | <ul style="list-style-type: none"> <li>- Health System Hospital Count</li> <li>- Health System Total Beds</li> </ul>                                                                                                                                                                                                                                                                                                                                                                                                                                                                                                                                                                                                                                                                                                                                                                                                               |
| American Hospital Association Survey, 2018                                                                 | Medicare Facility ID Number                                              | <ul style="list-style-type: none"> <li>- Inpatient Total Revenue</li> <li>- Annual Inpatient Discharges</li> <li>- Critical Access Hospital (as defined by CMS)</li> <li>- Rural Referral Center (as defined by CMS)</li> <li>- Sole Community Provider (as defined by CMS)</li> <li>- Major Teaching Status (major = Member of Council of Teaching Hospitals of the Association of American Medical Colleges)</li> <li>- Hospital Urban/Rural Location</li> <li>- Disproportionate Share Hospital (as defined by CMS)</li> <li>- US Census Based Region (New England = CT, MA, ME, NH, RI, VT; Middle Atlantic = NJ, NY, PA; South Atlantic = DC, DE, MD, VA, WV, NC, SC; East North Central = OH, IN, IL, MI, WI; East South Central = KY, TN, AL, MS; West North Central = MN, IA, MO, ND, SD, NE, KS; West South Central = AR, LA, OK, TX; Mountain = MT, ID, WY, CO, NM, AZ, UT, NV; Pacific = WA, OR, CA, AK, HI)</li> </ul> |
| Health Care Cost Institute Healthy Marketplace Index, 2022                                                 | Core-Based Statistical Area (defined by Office of Management and Budget) | <ul style="list-style-type: none"> <li>- Healthcare Price Index</li> <li>- Healthcare Spending Index</li> <li>- Healthcare Usage Index</li> <li>- Socioeconomic Vulnerability Index</li> <li>- Herfindhal-Hirschmann Index Market Concentration</li> </ul>                                                                                                                                                                                                                                                                                                                                                                                                                                                                                                                                                                                                                                                                         |
| Medicare Hospital Compare 2021 (Hospital General Information)                                              | Medicare Facility ID Number                                              | <ul style="list-style-type: none"> <li>- CMS Overall Hospital Rating (Hospital Overall Rating)</li> <li>- Hospital Mortality National Comparison (MORT group measure count)</li> <li>- Hospital Readmission National Comparison (READM group measure count)</li> </ul>                                                                                                                                                                                                                                                                                                                                                                                                                                                                                                                                                                                                                                                             |
| Medicare Hospital Compare 2021 (Hospital Consumer Assessment of Healthcare Providers and Systems (HCAHPS)) | Medicare Facility ID Number                                              | <ul style="list-style-type: none"> <li>- Patient Summary Star Rating (H-STAR-RATING)</li> </ul>                                                                                                                                                                                                                                                                                                                                                                                                                                                                                                                                                                                                                                                                                                                                                                                                                                    |
| Medicare Hospital Compare 2021 (Unplanned Hospital Visits Hospital)                                        | Medicare Facility ID Number                                              | <ul style="list-style-type: none"> <li>- Rate of Readmission for CABG Patients (READM-30-CABG)</li> </ul>                                                                                                                                                                                                                                                                                                                                                                                                                                                                                                                                                                                                                                                                                                                                                                                                                          |
| Medicare Hospital Compare 2021 (Complications and Deaths Hospital)                                         | Medicare Facility ID Number                                              | <ul style="list-style-type: none"> <li>- Death Rate for CABG Patients (MORT-30-CABG)</li> </ul>                                                                                                                                                                                                                                                                                                                                                                                                                                                                                                                                                                                                                                                                                                                                                                                                                                    |
| Dartmouth Atlas, 2021                                                                                      | Zip Code                                                                 | <ul style="list-style-type: none"> <li>- Hospital Referral Region</li> <li>- HRR Hospital Beds per 1K</li> </ul>                                                                                                                                                                                                                                                                                                                                                                                                                                                                                                                                                                                                                                                                                                                                                                                                                   |
| Medicare Geographical Practice Cost Index Fee Schedule, 2021                                               | Metropolitan Statistical Area                                            | <ul style="list-style-type: none"> <li>- Geographical Practice Cost Index (Calculated)</li> </ul>                                                                                                                                                                                                                                                                                                                                                                                                                                                                                                                                                                                                                                                                                                                                                                                                                                  |

**Table S2. Comparison of hospital reporting and not reporting commercial prices.**

| Hospital Characteristic      | Characteristic Category                     | Not        |            | P-value | Standardized Difference% |
|------------------------------|---------------------------------------------|------------|------------|---------|--------------------------|
|                              |                                             | Reporting  | Reporting  |         |                          |
| Hospital Type                | Government                                  | 55 (9.4)   | 61 (13.5)  | 0.032   | <b>-0.13</b>             |
|                              | Not-for-profit                              | 416 (71.1) | 324 (71.5) |         | -0.01                    |
|                              | For-profit                                  | 109 (18.6) | 64 (14.1)  |         | <b>+0.12</b>             |
|                              | Unspecified                                 | 5 (0.9)    | 4 (0.9)    |         | 0.00                     |
| Teaching Status              | Major teaching                              | 123 (21.0) | 82 (18.1)  | 0.012   | +0.07                    |
|                              | Minor teaching                              | 353 (60.3) | 252 (55.6) |         | +0.10                    |
|                              | Non-teaching                                | 109 (18.6) | 119 (26.3) |         | <b>-0.18</b>             |
|                              | Unspecified                                 | 0 (0)      | 0 (0)      |         | 0.00                     |
| Hospital Beds                | <250                                        | 176 (30.1) | 181 (40.0) | <0.001  | <b>-0.21</b>             |
|                              | 250-500                                     | 235 (40.2) | 190 (41.9) |         | -0.04                    |
|                              | >500                                        | 174 (29.7) | 82 (18.1)  |         | <b>+0.28</b>             |
|                              | Unspecified                                 | 0 (0)      | 0 (0)      |         | 0.00                     |
| Urban/Rural                  | Urban                                       | 23 (3.9)   | 33 (7.3)   | <0.001  | <b>-0.15</b>             |
|                              | Rural                                       | 562 (96.1) | 229 (50.6) |         | <b>+1.20</b>             |
|                              | Unspecified                                 | 0 (0)      | 191 (42.2) |         | <b>-1.21</b>             |
| Region                       | New England (CT, MA, ME, NH, RI, VT)        | 17 (2.9)   | 14 (3.1)   | <0.001  | <b>-0.01</b>             |
|                              | Middle Atlantic (NJ, NY, PA)                | 71 (12.1)  | 43 (9.5)   |         | +0.09                    |
|                              | South Atlantic (DC, DE, MD, VA, WV, NC, SC) | 106 (18.1) | 48 (10.6)  |         | <b>+0.22</b>             |
|                              | East North Central (OH, IN, IL, MI, WI)     | 136 (23.2) | 56 (12.4)  |         | <b>+0.29</b>             |
|                              | East South Central (KY, TN, AL, MS)         | 26 (4.4)   | 35 (7.7)   |         | <b>-0.14</b>             |
|                              | West North Central (MN, IA, MO, ND, SD, N   | 60 (10.3)  | 31 (6.8)   |         | <b>+0.12</b>             |
|                              | West South Central (AR, LA, OK, TX)         | 125 (21.4) | 60 (13.2)  |         | <b>+0.22</b>             |
|                              | Mountain (MT, ID, WY, CO, NM, AZ, UT, NV)   | 21 (3.6)   | 51 (11.3)  |         | <b>-0.30</b>             |
|                              | Pacific (WA, OR, CA, AK, HI)                | 23 (3.9)   | 115 (25.4) |         | <b>-0.64</b>             |
| Health System Number of Beds | <2000                                       | 249 (42.6) | 217 (40.7) | 0.009   | +0.04                    |
|                              | 2000-10000                                  | 181 (30.9) | 133 (25.0) |         | <b>+0.13</b>             |
|                              | >10000                                      | 155 (26.5) | 183 (34.3) |         | <b>-0.17</b>             |
|                              | Unspecified                                 | 0 (0)      | 0 (0)      |         | 0.00                     |
| Major Investor Owned         | Yes                                         | 100 (17.1) | 54 (11.9)  | 0.075   | <b>+0.15</b>             |
|                              | No                                          | 473 (80.9) | 355 (78.4) |         | +0.06                    |
|                              | Unspecified                                 | 12 (2.1)   | 44 (9.7)   |         | <b>-0.33</b>             |
| DSH                          | Yes                                         | 489 (83.6) | 368 (81.2) | 0.025   | +0.06                    |
|                              | No                                          | 61 (10.4)  | 32 (7.1)   |         | <b>+0.12</b>             |
|                              | Sole Community Hospital                     | 27 (4.6)   | 35 (7.7)   |         | <b>-0.13</b>             |
|                              | Unspecified                                 | 8 (1.4)    | 18 (4.0)   |         | <b>-0.16</b>             |
| Sole Community Provider      | Yes                                         | 11 (1.9)   | 20 (4.4)   | 0.026   | <b>-0.15</b>             |
|                              | No                                          | 574 (98.1) | 433 (95.6) |         | <b>+0.15</b>             |
|                              | Unspecified                                 | 0 (0)      | 0 (0)      |         | 0.00                     |
| Rural Referral Center        | Yes                                         | 91 (15.6)  | 86 (19.0)  | 0.157   | -0.09                    |
|                              | No                                          | 494 (84.4) | 367 (81.0) |         | +0.09                    |
|                              | Unspecified                                 | 0 (0)      | 0 (0)      |         | 0.00                     |
| Inpatient Revenue            | <\$500M                                     | 124 (21.2) | 142 (31.8) | 0.001   | <b>-0.24</b>             |
|                              | \$500M-\$2B                                 | 328 (56.1) | 225 (50.3) |         | <b>+0.12</b>             |
|                              | >\$2B                                       | 133 (22.7) | 80 (17.9)  |         | <b>+0.12</b>             |

**Figure S1. Cohort selection.**

## Cohort Selection

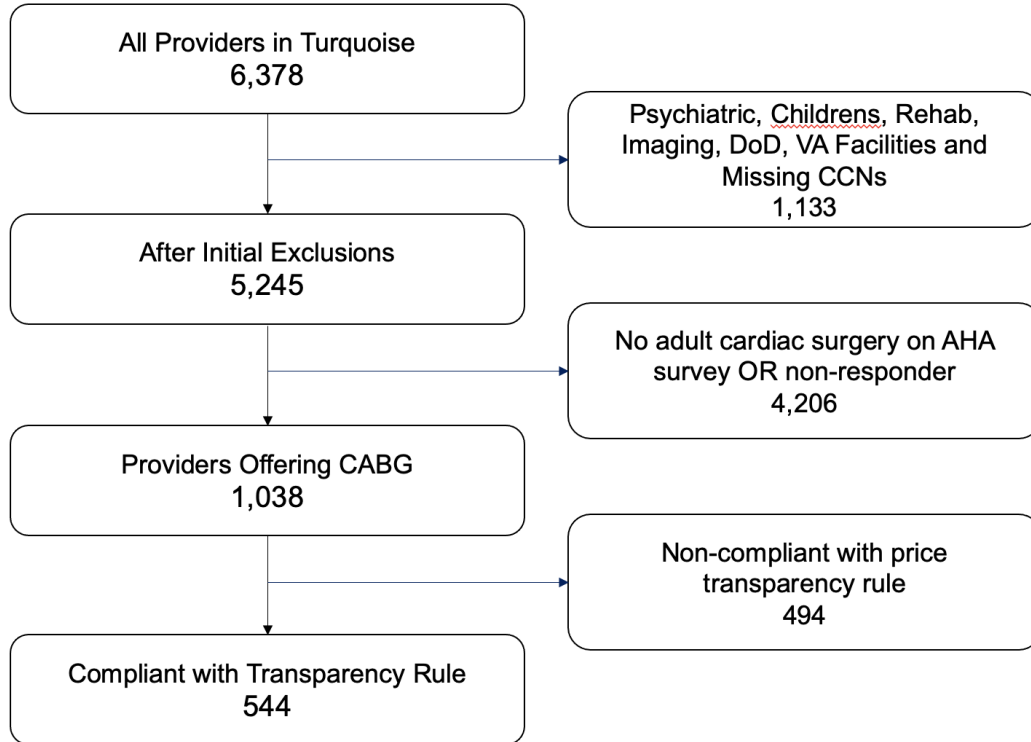

Supplement: JAH3-13-e031982-s001.pdf [file JAH3-13-e031982-s001.pdf]
